# Supplementary material
Source: PubMed Central journal article supplement (PMC3893933)
Supplement: NIHMS509494-supplement-1.pdf [file NIHMS509494-supplement-1.pdf]

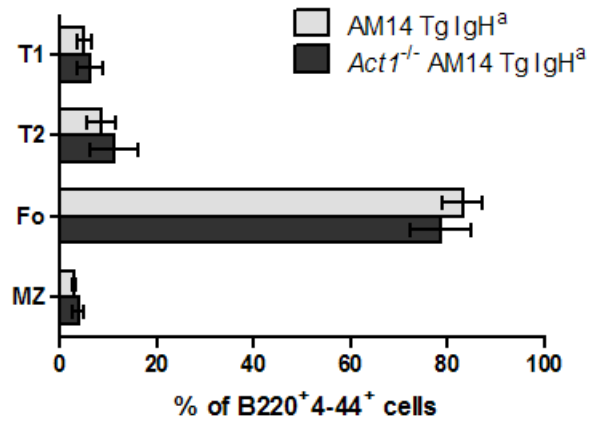

Supplementary Figure 1. Development of B cells in AM14 Tg *Act1*<sup>-/-</sup> mice. Bar graphs showing the distribution of 4-44<sup>+</sup> cells within different B cell subsets in spleens from AM14 Tg IgH<sup>a</sup> (n=3) or AM14 Tg *Act1*<sup>-/-</sup> IgH<sup>a</sup> mice (n=3). B220<sup>+</sup> 4-44<sup>+</sup> cells were gated and classified as T1 (AA4.1<sup>+</sup>CD23<sup>-</sup>IgM<sup>+</sup>), T2 (AA4.1<sup>+</sup>CD23<sup>+</sup>IgM<sup>hi</sup>), Fo (AA4.1<sup>-</sup>CD23<sup>+</sup>IgM<sup>+</sup>) or MZ (AA4.1<sup>-</sup>CD23<sup>-</sup>IgM<sup>hi</sup>).
