# Supplementary material
Source: PubMed Central journal article supplement (PMC3893933)
Supplement: NIHMS509494-supplement-2.pdf [file NIHMS509494-supplement-2.pdf]

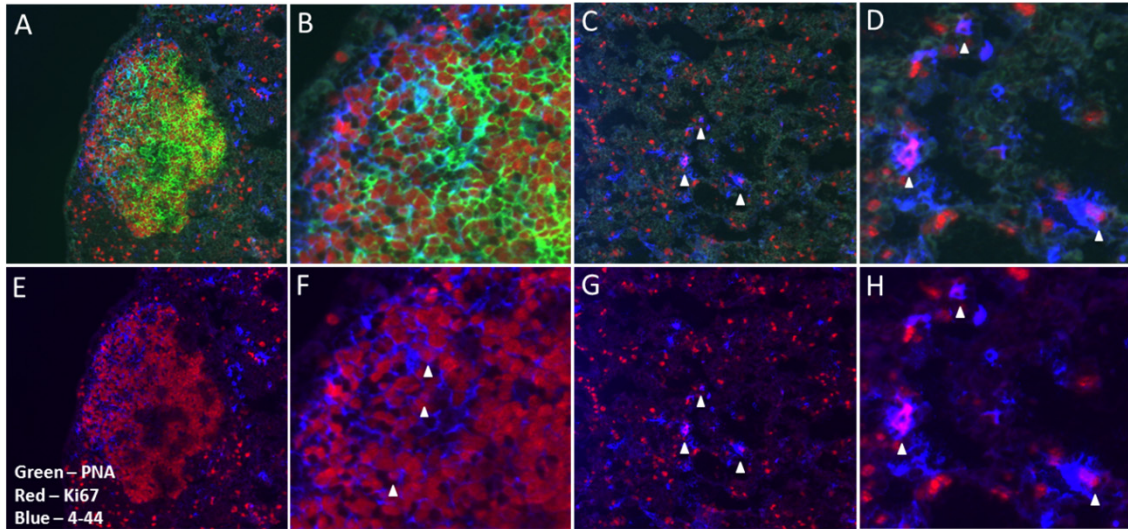

Supplementary Figure 2. AM14 Tg B cells in the AM14 Tg *Act1<sup>-/-</sup>* mice undergo proliferation in the GC as well as at extrafollicular sites. Immunofluorescent images of cLNs show PNA<sup>+</sup> GC cells in green, Ki67<sup>+</sup> cells in red, and 4-44<sup>+</sup> AM14 Tg cells in blue. AM14 Tg B cells are proliferating within the GC (left panels) shown with (A, B) and without (E, F) PNA staining. AM14 Tg B cell are also proliferating at extrafollicular foci (right panels) shown with (C, D) and without (G, H) PNA staining. Panels A, C, E and G represents approximately ½ of a visual field of images captured at 100x power. Panels B, D, F, and H show zoomed in images of panels A, C, E, and G, respectively. White arrows indicate a sampling of cells double positive for Ki67 and 4-44. Images are typical of 3 mice analyzed.
