# Supplementary material
Source: PubMed Central journal article supplement (PMC3893933)
Supplement: NIHMS509494-supplement-3.pdf [file NIHMS509494-supplement-3.pdf]

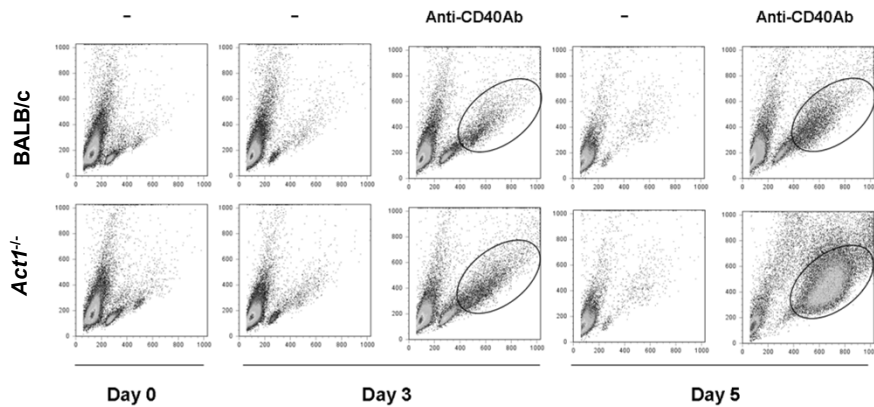

Supplementary Figure 3. *Act1*<sup>-/-</sup> B cells respond more vigorously to CD40-ligation. Magnetically purified splenic B cells from control BALB/c or *Act1*<sup>-/-</sup> mice were grown in RPMI in the presence or absence of 10  $\mu$ g/ml anti-CD40 Ab (BD Biosciences). Shown are representative FSC/SSC FACS plots at day 0, day 3, and day 5; circles indicate the appearance of proliferating blast-like cells.
